# Supplementary material for: Rotameric transformations in the photochemistry of TpM(CO)2(η3-C3H4R), where Tp = tris(pyrazolyl)borate, M = Mo or W, and R = H or Me
Source: Royal Society of Chemistry journal article supplement (doi:10.1039/c4dt03940h), 2015-01-01
Supplement: c4dt03940h1.pdf [file c4dt03940h1.pdf]

## SUPPLEMENTAL INFORMATION

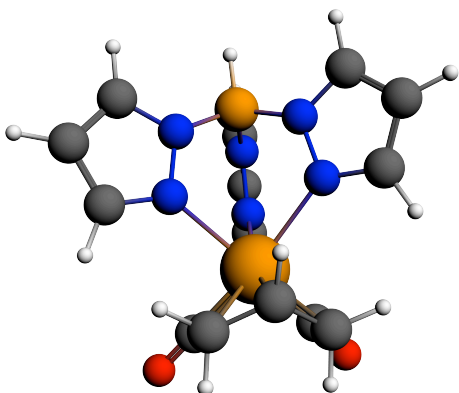

**1a: *exo*-TpMo(CO)<sub>2</sub>(η<sup>3</sup>-C<sub>3</sub>H<sub>5</sub>)**

### TZP/BP

**Coordinates (XYZ):**

|    |             |             |             |
|----|-------------|-------------|-------------|
| B  | 0.01990767  | 2.38179913  | 0.17699617  |
| H  | 0.05423169  | 3.57607670  | 0.30711176  |
| H  | 3.78090294  | 2.09622227  | -2.70203911 |
| H  | 0.84232066  | -0.99877203 | 3.18308559  |
| H  | -3.54232998 | -0.33914890 | -0.85428258 |
| N  | -1.38639535 | 1.94757465  | -0.26567166 |
| N  | -1.71429823 | 0.62691172  | -0.39935717 |
| C  | -2.47472738 | 2.72719070  | -0.48182247 |
| C  | -3.55437608 | 1.90125318  | -0.76738588 |
| C  | -3.02761000 | 0.60143640  | -0.70297202 |
| C  | 2.38973372  | 0.54854700  | -1.87739778 |
| C  | 2.90266658  | 1.83130101  | -2.12362995 |
| N  | 1.07415641  | 1.94131150  | -0.85652254 |
| H  | -2.39978905 | 3.80641021  | -0.41109865 |
| H  | 1.19016486  | 1.30083943  | 4.66499512  |
| H  | -4.57442634 | 2.19581492  | -0.98831773 |
| N  | 0.34987464  | 1.69365168  | 1.51871445  |
| N  | 0.39934868  | 0.33102722  | 1.60481851  |
| C  | 0.65890925  | 2.23995526  | 2.71797968  |
| C  | 0.91657731  | 1.21058281  | 3.61965761  |
| C  | 0.74254147  | 0.03568745  | 2.87533642  |
| H  | 2.04498789  | 3.76559646  | -1.33915477 |
| C  | 2.03999345  | 2.68681632  | -1.44748189 |
| H  | 2.77733300  | -0.41163335 | -2.19525770 |
| H  | 0.67575977  | 3.31715552  | 2.84180481  |
| N  | 1.27742308  | 0.61602482  | -1.11853428 |
| Mo | -0.04935494 | -0.98961820 | -0.13203144 |
| H  | -2.69958421 | -2.09876511 | -0.97360624 |
| O  | 2.44503058  | -2.78820632 | 0.50046764  |
| O  | -1.28464919 | -2.93057062 | 2.01012153  |
| C  | -0.87850241 | -2.19116139 | 1.19288409  |
| C  | 1.50825103  | -2.12337711 | 0.25505437  |
| C  | -0.85131485 | -1.76219124 | -2.08458224 |
| H  | -1.20925665 | -0.91407471 | -2.66689528 |
| C  | 0.50111781  | -2.17190792 | -2.11751070 |
| H  | 1.19265794  | -1.65537394 | -2.78028020 |
| H  | 0.74853009  | -3.21132073 | -1.89810110 |
| H  | -1.46945267 | -3.44955683 | -0.87851450 |
| C  | -1.66180854 | -2.39918616 | -1.10225008 |

ΔH = 0.0 kcal mol<sup>-1</sup>  
ΔG = 0.0 kcal mol<sup>-1</sup>

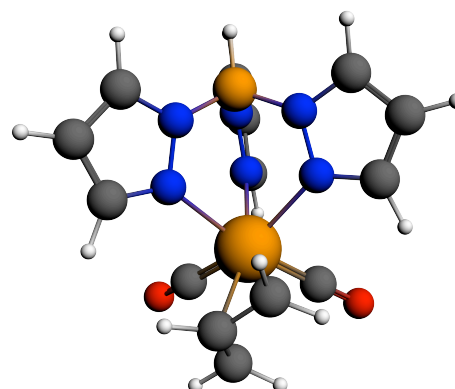

**1b: TpMo(CO)<sub>2</sub>(η<sup>3</sup>-C<sub>3</sub>H<sub>5</sub>)  
*exo* ↔ *gauche* transition state**

### TZP/BP

**Coordinates (XYZ):**

|    |             |             |             |
|----|-------------|-------------|-------------|
| B  | -0.14874672 | 2.41274802  | 0.00000000  |
| H  | -0.28554703 | 3.60693013  | 0.00000000  |
| H  | 1.82286028  | 2.15396523  | 4.30233352  |
| H  | -3.22740632 | -0.99407956 | 0.00000000  |
| H  | 1.61260097  | -0.35644469 | -3.21038209 |
| N  | 0.60458302  | 1.97100787  | -1.26416435 |
| N  | 0.83961572  | 0.64789571  | -1.51803021 |
| C  | 0.96128749  | 2.72609571  | -2.33288049 |
| C  | 1.44899361  | 1.88025118  | -3.32181085 |
| C  | 1.34809152  | 0.59538710  | -2.76666851 |
| C  | 1.34809152  | 0.59538710  | 2.76666851  |
| C  | 1.44899361  | 1.88025118  | 3.32181085  |
| N  | 0.60458302  | 1.97100787  | 1.26416435  |
| H  | 0.83991320  | 3.80324153  | -2.30926206 |
| H  | -4.77951565 | 1.28344242  | 0.00000000  |
| H  | 1.82286028  | 2.15396523  | -4.30233352 |
| N  | -1.52887360 | 1.72149704  | 0.00000000  |
| N  | -1.60496922 | 0.35721966  | 0.00000000  |
| C  | -2.77317798 | 2.25041880  | 0.00000000  |
| C  | -3.69795500 | 1.20824276  | 0.00000000  |
| C  | -2.91845549 | 0.04438828  | 0.00000000  |
| H  | 0.83991320  | 3.80324153  | 2.30926206  |
| C  | 0.96128749  | 2.72609571  | 2.33288049  |
| H  | 1.61260097  | -0.35644469 | 3.21038209  |
| H  | -2.91253325 | 3.32605600  | 0.00000000  |
| N  | 0.83961572  | 0.64789571  | 1.51803021  |
| Mo | 0.16171708  | -0.99267770 | 0.00000000  |
| H  | 1.71350005  | -2.51494839 | -2.15173870 |
| O  | -1.49804743 | -2.82186748 | 1.94863735  |
| O  | -1.49804743 | -2.82186748 | -1.94863735 |
| C  | -0.83724827 | -2.14202063 | -1.25712979 |
| C  | -0.83724827 | -2.14202063 | 1.25712979  |
| C  | 1.74245243  | -2.74835278 | 0.00000000  |
| H  | 1.29036590  | -3.73994139 | 0.00000000  |
| C  | 1.92379989  | -2.03390136 | 1.19736216  |
| H  | 1.71350005  | -2.51494839 | 2.15173870  |
| H  | 2.65369332  | -1.22368199 | 1.21334439  |
| H  | 2.65369332  | -1.22368199 | -1.21334439 |
| C  | 1.92379989  | -2.03390136 | -1.19736216 |

ΔH = 8.6 kcal mol<sup>-1</sup>  
ΔG = 9.7 kcal mol<sup>-1</sup>

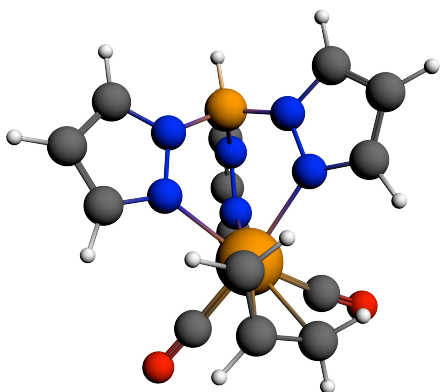

**1c: *gauche*-TpMo(CO)<sub>2</sub>(η<sup>3</sup>-C<sub>3</sub>H<sub>5</sub>)**

**TZP/BP**

**Coordinates (XYZ):**

|    |             |              |             |
|----|-------------|--------------|-------------|
| B  | -0.12981784 | -2.35058469  | -0.12086837 |
| H  | -0.18853504 | -3.54734289  | -0.21511746 |
| H  | 3.80142902  | -2.21564234  | 2.55699359  |
| H  | 0.88995684  | 0.85009596   | -3.26298198 |
| H  | -3.30061841 | 0.67190208   | 1.26662597  |
| N  | -1.45805120 | -1.80754526  | 0.43667004  |
| N  | -1.64354425 | -0.46700306  | 0.61581830  |
| C  | -2.59065179 | -2.48444077  | 0.75732151  |
| C  | -3.54817156 | -1.56322423  | 1.16545341  |
| C  | -2.90766212 | -0.31677346  | 1.05478550  |
| C  | 2.50810868  | -0.60842260  | 1.68555059  |
| C  | 2.92373378  | -1.91312029  | 1.99660402  |
| N  | 1.03971170  | -1.95061076  | 0.80666713  |
| H  | -2.62909508 | -3.56460254  | 0.67297011  |
| H  | 0.90908994  | -1.51157406  | -4.68955024 |
| H  | -4.56340479 | -1.76410036  | 1.48956174  |
| N  | 0.14472391  | -1.72289304  | -1.50562120 |
| N  | 0.35252495  | -0.37900689  | -1.63521576 |
| C  | 0.34901684  | -2.334115306 | -2.69957189 |
| C  | 0.68650783  | -1.36528933  | -3.63843554 |
| C  | 0.67813027  | -0.15725330  | -2.92291066 |
| H  | 1.88011045  | -3.81515843  | 1.37201803  |
| C  | 1.96583188  | -2.73518573  | 1.41140805  |
| H  | 2.97322153  | 0.33987400   | 1.93102871  |
| H  | 0.24831034  | -3.40990472  | -2.78808238 |
| N  | 1.36783683  | -0.63599500  | 0.97042745  |
| Mo | 0.05843745  | 0.99612785   | 0.10622477  |
| H  | 0.71955944  | 1.08391746   | 3.03334432  |
| O  | 2.60041333  | 2.64719851   | -0.68498375 |
| O  | -1.91316051 | 2.26872536   | -2.01296289 |
| C  | -1.16433788 | 1.86421155   | -1.21011970 |
| C  | 1.62950002  | 2.03620348   | -0.41063309 |
| C  | 0.02820378  | 2.65907702   | 1.71322207  |
| H  | 0.91825197  | 3.28386786   | 1.77260592  |
| C  | -1.04912346 | 2.97379912   | 0.82302269  |
| H  | -0.97522057 | 3.88501942   | 0.22990132  |
| H  | -2.06403594 | 2.71832981   | 1.13771108  |
| H  | -1.08750282 | 1.06137368   | 2.65800520  |
| C  | -0.09887867 | 1.45248787   | 2.41618945  |

ΔH = 6.6 kcal mol<sup>-1</sup>  
ΔG = 6.5 kcal mol<sup>-1</sup>

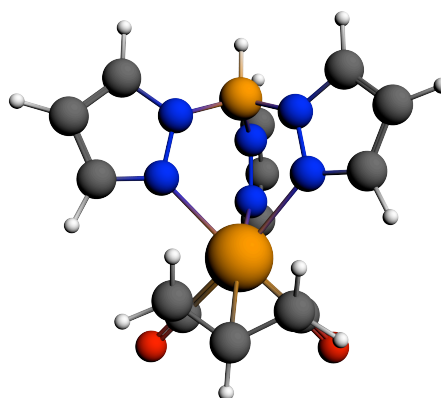

**1d: TpMo(CO)<sub>2</sub>(η<sup>3</sup>-C<sub>3</sub>H<sub>5</sub>)  
*gauche* ↔ *endo* transition state**

**TZP/BP**

**Coordinates (XYZ):**

|    |             |             |             |
|----|-------------|-------------|-------------|
| B  | -0.12949400 | 2.40436000  | 0.22717600  |
| H  | -0.16731000 | 3.59480000  | 0.38984100  |
| H  | 3.37433000  | 2.45372000  | -2.97402000 |
| H  | 1.03878000  | -1.00235000 | 3.07919000  |
| H  | -3.54022000 | -0.54907100 | -0.63310500 |
| N  | -1.52208000 | 1.88490000  | -0.16035800 |
| N  | -1.75384000 | 0.54841700  | -0.34100600 |
| C  | -2.68775000 | 2.57736000  | -0.20321800 |
| C  | -3.72309000 | 1.67634000  | -0.41697700 |
| C  | -3.08976000 | 0.42533600  | -0.49066200 |
| C  | 2.19306000  | 0.78929400  | -2.05406000 |
| C  | 2.58523000  | 2.11121000  | -2.31360000 |
| N  | 0.89923100  | 2.05691000  | -0.86029600 |
| H  | -2.69221000 | 3.65402000  | -0.07533140 |
| H  | 1.32280000  | 1.26718000  | 4.61875000  |
| H  | -4.78218000 | 1.89220000  | -0.50600200 |
| N  | 0.30316700  | 1.70394000  | 1.53218000  |
| N  | 0.43516600  | 0.34387800  | 1.56953000  |
| C  | 0.64072900  | 2.23104000  | 2.73104000  |
| C  | 1.00137000  | 1.19215000  | 3.58603000  |
| C  | 0.85801000  | 0.03233460  | 2.81321000  |
| H  | 1.66856000  | 3.95998000  | -1.39832000 |
| C  | 1.73699000  | 2.88598000  | -1.53023000 |
| H  | 2.60133000  | -0.13092600 | -2.45300000 |
| H  | 0.60538000  | 3.30362000  | 2.88810000  |
| N  | 1.16820000  | 0.75586300  | -1.17826000 |
| Mo | 0.01731170  | -0.98837700 | -0.15913200 |
| H  | 1.52443000  | -2.14352000 | -2.55684000 |
| O  | 2.60256000  | -2.66525000 | 0.45237000  |
| O  | -1.07301000 | -3.01413000 | 1.99645000  |
| C  | -0.71365600 | -2.25327000 | 1.18022000  |
| C  | 1.63768000  | -2.03802000 | 0.21626600  |
| C  | -0.37979800 | -2.72396000 | -1.72077000 |
| H  | -0.04113570 | -3.70195000 | -1.37886000 |
| C  | -1.63774000 | -2.21732000 | -1.34232000 |
| H  | -2.34329000 | -2.85020000 | -0.80545200 |
| H  | -2.06911000 | -1.42893000 | -1.95890000 |
| H  | 0.10601700  | -1.01403000 | -2.94164000 |
| C  | 0.50768600  | -1.82451000 | -2.33179000 |

ΔH = 8.0 kcal mol<sup>-1</sup>  
ΔG = 7.8 kcal mol<sup>-1</sup>

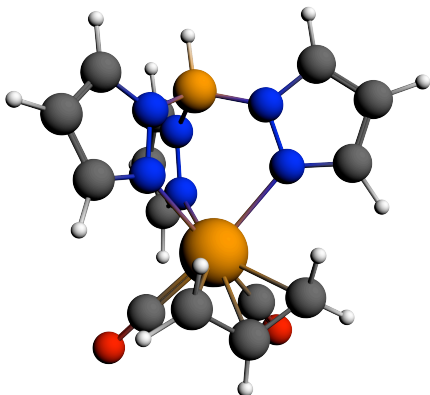

**1e: endo-TpMo(CO)<sub>2</sub>(η<sup>3</sup>-C<sub>3</sub>H<sub>5</sub>)**

TZP/BP

Coodinates (XYZ):

|    |             |             |             |
|----|-------------|-------------|-------------|
| B  | -0.14874672 | 2.41274802  | 0.00000000  |
| H  | -0.28554703 | 3.60693013  | 0.00000000  |
| H  | 1.82286028  | 2.15396523  | 4.30233352  |
| H  | -3.22740632 | -0.99407956 | 0.00000000  |
| H  | 1.61260097  | -0.35644469 | -3.21038209 |
| N  | 0.60458302  | 1.97100787  | -1.26416435 |
| N  | 0.83961572  | 0.64789571  | -1.51803021 |
| C  | 0.96128749  | 2.72609571  | -2.33288049 |
| C  | 1.44899361  | 1.88025118  | -3.32181085 |
| C  | 1.34809152  | 0.59538710  | -2.76666851 |
| C  | 1.34809152  | 0.59538710  | 2.76666851  |
| C  | 1.44899361  | 1.88025118  | 3.32181085  |
| N  | 0.60458302  | 1.97100787  | 1.26416435  |
| H  | 0.83991320  | 3.80324153  | -2.30926206 |
| H  | -4.77951565 | 1.28344242  | 0.00000000  |
| H  | 1.82286028  | 2.15396523  | -4.30233352 |
| N  | -1.52887360 | 1.72149704  | 0.00000000  |
| N  | -1.60496922 | 0.35721966  | 0.00000000  |
| C  | -2.77317798 | 2.25041880  | 0.00000000  |
| C  | -3.69795500 | 1.20824276  | 0.00000000  |
| C  | -2.91845549 | 0.04438828  | 0.00000000  |
| H  | 0.83991320  | 3.80324153  | 2.30926206  |
| C  | 0.96128749  | 2.72609571  | 2.33288049  |
| H  | 1.61260097  | -0.35644469 | 3.21038209  |
| H  | -2.91253325 | 3.32605600  | 0.00000000  |
| N  | 0.83961572  | 0.64789571  | 1.51803021  |
| Mo | 0.16171708  | -0.99267770 | 0.00000000  |
| H  | 1.71350005  | -2.51494839 | -2.15173870 |
| O  | -1.49804743 | -2.82186748 | 1.94863735  |
| O  | -1.49804743 | -2.82186748 | -1.94863735 |
| C  | -0.83724827 | -2.14202063 | -1.25712979 |
| C  | -0.83724827 | -2.14202063 | 1.25712979  |
| C  | 1.74245243  | -2.74835278 | 0.00000000  |
| H  | 1.29036590  | -3.73994139 | 0.00000000  |
| C  | 1.92379989  | -2.03390136 | 1.19736216  |
| H  | 1.71350005  | -2.51494839 | 2.15173870  |
| H  | 2.65369332  | -1.22368199 | 1.21334439  |
| H  | 2.65369332  | -1.22368199 | -1.21334439 |
| C  | 1.92379989  | -2.03390136 | -1.19736216 |

ΔH = 7.8 kcal mol<sup>-1</sup>  
ΔG = 7.8 kcal mol<sup>-1</sup>

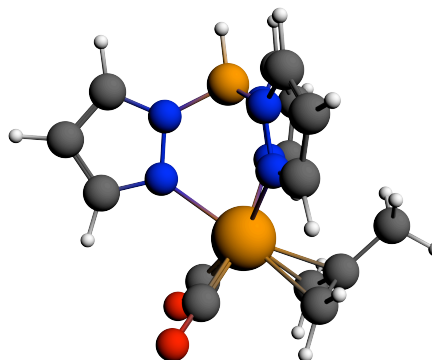

**2a: exo-TpMo(CO)<sub>2</sub>(η<sup>3</sup>-C<sub>3</sub>H<sub>4</sub>Me)**

TZP/BP

Coodinates (XYZ):

|    |             |             |             |
|----|-------------|-------------|-------------|
| B  | 0.02017141  | 2.38857517  | 0.16807226  |
| H  | 0.05162232  | 3.58404119  | 0.29343065  |
| H  | 3.62135741  | 2.18250994  | -2.90894990 |
| H  | 0.90870484  | -0.99000657 | 3.15650501  |
| H  | -3.58153736 | -0.37854093 | -0.48586787 |
| N  | -1.40442912 | 1.94635005  | -0.20905062 |
| N  | -1.72814704 | 0.62096180  | -0.29323937 |
| C  | -2.52301126 | 2.70881783  | -0.29356760 |
| C  | -3.61796033 | 1.86515817  | -0.43521207 |
| C  | -3.06876536 | 0.57284070  | -0.42257359 |
| C  | 2.34239287  | 0.59707716  | -1.97793289 |
| C  | 2.78886083  | 1.89429264  | -2.27661381 |
| N  | 1.03714948  | 1.95496874  | -0.90349432 |
| H  | -2.45747542 | 3.78932411  | -0.23329289 |
| H  | 1.30231395  | 1.30958277  | 4.62842067  |
| H  | -4.66212032 | 2.14355109  | -0.52587993 |
| N  | 0.40086701  | 1.70404354  | 1.49899612  |
| N  | 0.44438451  | 0.34081672  | 1.58651943  |
| C  | 0.73260783  | 2.24946343  | 2.69261141  |
| C  | 1.00620622  | 1.21970638  | 3.58932114  |
| C  | 0.80839810  | 0.04489515  | 2.85035356  |
| H  | 1.90079555  | 3.80757513  | -1.47505301 |
| C  | 1.93335651  | 2.72773647  | -1.56604779 |
| H  | 2.74935720  | -0.35015900 | -2.30840349 |
| H  | 0.75292577  | 3.32651566  | 2.81680196  |
| N  | 1.27705554  | 0.63246343  | -1.15316641 |
| Mo | -0.04531131 | -0.98080164 | -0.13702514 |
| H  | -2.64551160 | -1.92451880 | -1.32333191 |
| O  | 2.26948699  | -2.90559126 | 0.76076981  |
| O  | -1.52643990 | -2.85705966 | 1.90348722  |
| C  | -1.01047496 | -2.14867594 | 1.12150628  |
| C  | 1.43482485  | -2.16565754 | 0.39150526  |
| C  | -0.66230895 | -1.74709310 | -2.18965371 |
| H  | -0.15874232 | -0.07995634 | -3.48445095 |
| C  | 0.64700015  | -2.26912469 | -1.98965197 |
| H  | 1.46883481  | -1.86726993 | -2.58154419 |
| H  | 0.76078098  | -3.31676648 | -1.70766392 |
| H  | -1.53275695 | -3.34530220 | -1.00194498 |
| C  | -1.62225816 | -2.29744996 | -1.29213640 |
| C  | -1.00546109 | -0.74049104 | -3.25987722 |
| H  | -1.26982665 | -1.27521742 | -4.18678734 |
| H  | -1.86364623 | -0.12020172 | -2.97446731 |

ΔH = 0.0 kcal mol<sup>-1</sup>  
ΔG = 0.0 kcal mol<sup>-1</sup>

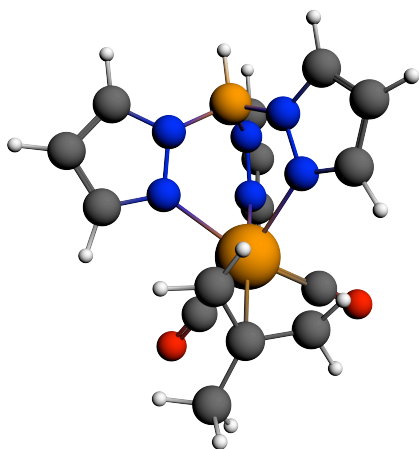

**2b: *gauche*-TpMo(CO)<sub>2</sub>(η<sup>3</sup>-C<sub>3</sub>H<sub>4</sub>Me)**

TZP/BP

Coodinates (XYZ):

|    |             |             |             |
|----|-------------|-------------|-------------|
| B  | -0.16550738 | -2.36738021 | -0.11488105 |
| H  | -0.24034505 | -3.56385314 | -0.20665877 |
| H  | 3.83545825  | -2.29246091 | 2.45575897  |
| H  | 0.88934807  | 0.81690765  | -3.25314219 |
| H  | -3.31923546 | 0.65292984  | 1.33549916  |
| N  | -1.47549039 | -1.81279916 | 0.46959846  |
| N  | -1.66014441 | -0.47006059 | 0.64917628  |
| C  | -2.59602146 | -2.49464910 | 0.81890615  |
| C  | -3.54925563 | -1.57789555 | 1.24396074  |
| C  | -2.91646382 | -0.32950147 | 1.11691524  |
| C  | 2.53204113  | -0.66522056 | 1.63909900  |
| C  | 2.94566788  | -1.97611627 | 1.92265252  |
| N  | 1.02828193  | -1.98411613 | 0.78698505  |
| H  | -2.63080401 | -3.57517175 | 0.73696976  |
| H  | 0.84018900  | -1.53644741 | -4.69022691 |
| H  | -4.55660396 | -1.78196805 | 1.58996940  |
| N  | 0.08790541  | -1.74437066 | -1.50337430 |
| N  | 0.32520850  | -0.40401257 | -1.62732221 |
| C  | 0.27270653  | -2.35453765 | -2.70038660 |
| C  | 0.62447007  | -1.38904410 | -3.63782891 |
| C  | 0.65106064  | -0.18549664 | -2.91622505 |
| H  | 1.86591376  | -3.86199429 | 1.30997749  |
| C  | 1.96362728  | -2.78319889 | 1.35624277  |
| H  | 3.01204298  | 0.27602668  | 1.88121891  |
| H  | 0.15214157  | -3.42819195 | -2.79210115 |
| N  | 1.37166667  | -0.67390377 | 0.95629722  |
| Mo | 0.07732280  | 0.98158400  | 0.10881990  |
| H  | 1.00656452  | 1.29509994  | 2.99447650  |
| O  | 2.61932406  | 2.59114016  | -0.73719466 |
| O  | -1.49691160 | 2.52310191  | -2.16806830 |
| C  | -0.94114385 | 1.98523840  | -1.29134039 |
| C  | 1.65439196  | 1.99565408  | -0.40350554 |
| C  | -0.07719365 | 2.68977182  | 1.74871060  |
| H  | 0.93379630  | 4.42222304  | 0.92475902  |
| C  | -1.25324356 | 2.75339329  | 0.93165018  |
| H  | -1.42806486 | 3.67396483  | 0.37267557  |
| H  | -2.16335566 | 2.27448754  | 1.29394744  |
| H  | -0.77276575 | 0.87607386  | 2.72155023  |
| C  | 0.08960351  | 1.47730882  | 2.43301328  |
| C  | 0.88833394  | 3.84069641  | 1.85362483  |
| H  | 0.55222649  | 4.51420015  | 2.65949002  |
| H  | 1.90202201  | 3.50106646  | 2.10096085  |

ΔH = 5.7 kcal mol<sup>-1</sup>  
ΔG = 5.2 kcal mol<sup>-1</sup>

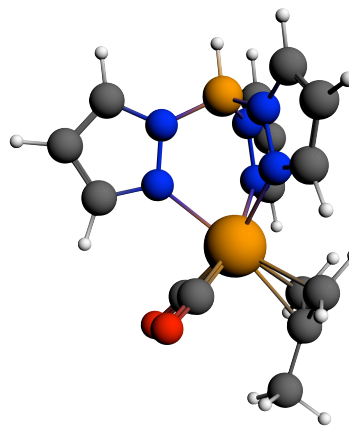

**2c: *endo*-TpMo(CO)<sub>2</sub>(η<sup>3</sup>-C<sub>3</sub>H<sub>4</sub>Me)**

TZP/BP

Coodinates (XYZ):

|    |             |             |             |
|----|-------------|-------------|-------------|
| B  | -0.14290723 | 2.41796285  | -0.00004806 |
| H  | -0.27084239 | 3.61308728  | -0.00013267 |
| H  | 1.83139955  | 2.14526351  | 4.30105061  |
| H  | -3.24508717 | -0.96666498 | -0.00159822 |
| H  | 1.60066712  | -0.36533189 | -3.20780062 |
| N  | 0.60627397  | 1.97080311  | -1.26514508 |
| N  | 0.83221488  | 0.64612885  | -1.51845036 |
| C  | 0.96965925  | 2.72285201  | -2.33385290 |
| C  | 1.45266184  | 1.87302189  | -3.32183193 |
| C  | 1.34184619  | 0.58907873  | -2.76615286 |
| C  | 1.34389545  | 0.59018865  | 2.76556960  |
| C  | 1.45433396  | 1.87431418  | 3.32092933  |
| N  | 0.60777490  | 1.97125923  | 1.26429839  |
| H  | 0.85618279  | 3.80084307  | -2.31083310 |
| H  | -4.78136475 | 1.32189057  | -0.00146566 |
| H  | 1.82970008  | 2.14363464  | -4.30205499 |
| N  | -1.52760987 | 1.73690148  | 0.00067920  |
| N  | -1.61330963 | 0.37327954  | -0.00001470 |
| C  | -2.76827858 | 2.27476241  | 0.00033351  |
| C  | -3.70029066 | 1.23920276  | -0.00076985 |
| C  | -2.92881106 | 0.06971656  | -0.00077466 |
| H  | 0.85707936  | 3.80172413  | 2.30958185  |
| C  | 0.97090717  | 2.72373613  | 2.33285239  |
| H  | 1.60280271  | -0.36396551 | 3.20778872  |
| H  | -2.89996407 | 3.35136607  | 0.00054033  |
| N  | 0.83441925  | 0.64666818  | 1.51770946  |
| Mo | 0.14586291  | -0.99093530 | 0.00037850  |
| H  | 1.71658905  | -2.50718645 | -2.14664685 |
| O  | -1.53154022 | -2.80449529 | 1.94542092  |
| O  | -1.52668667 | -2.80573582 | -1.94708571 |
| C  | -0.85948608 | -2.13005455 | -1.25586666 |
| C  | -0.86307401 | -2.12916196 | 1.25534069  |
| C  | 1.73248222  | -2.78517562 | 0.00114115  |
| H  | 2.18594906  | -4.86907252 | -0.00488179 |
| C  | 1.89861216  | -2.04085602 | 1.18910127  |
| H  | 1.70294291  | -2.51797625 | 2.15032302  |
| H  | 2.61994702  | -1.22312606 | 1.19698192  |
| H  | 2.62736737  | -1.21668865 | -1.18119606 |
| C  | 1.90690754  | -2.03523997 | -1.18181945 |
| C  | 1.29076033  | -4.22596414 | -0.00386674 |
| H  | 0.70022622  | -4.47545711 | 0.88621230  |
| H  | 0.70229765  | -4.47005443 | -0.89682995 |

ΔH = 6.1 kcal mol<sup>-1</sup>  
ΔG = 6.0 kcal mol<sup>-1</sup>

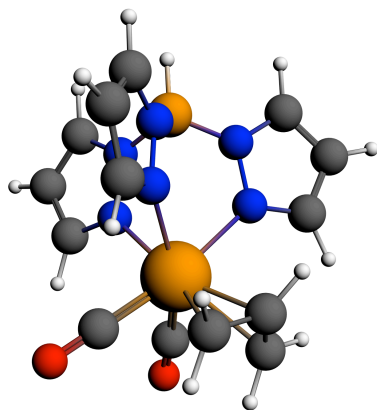

**3a: *exo*-TpW(CO)<sub>2</sub>( $\eta^3$ -C<sub>3</sub>H<sub>5</sub>)**

**TZP/BP**

**Coordinates (XYZ):**

|   |             |             |             |
|---|-------------|-------------|-------------|
| B | 0.01796255  | 2.39896739  | 0.17239798  |
| H | 0.04878119  | 3.59385487  | 0.29827745  |
| H | 3.80496827  | 2.05694967  | -2.66710336 |
| H | 0.83633300  | -1.00859471 | 3.14378094  |
| H | -3.50482213 | -0.37445945 | -0.83910264 |
| N | -1.38593593 | 1.95057337  | -0.26504457 |
| N | -1.69271316 | 0.62363542  | -0.39897230 |
| C | -2.48962307 | 2.70976020  | -0.46935811 |
| C | -3.55621074 | 1.86458847  | -0.74893498 |
| C | -3.00781812 | 0.57492348  | -0.69066892 |
| C | 2.38709643  | 0.53244526  | -1.85078178 |
| C | 2.91555920  | 1.80693767  | -2.09959548 |
| N | 1.06930849  | 1.94964170  | -0.86139599 |
| H | -2.43414073 | 3.78981228  | -0.39574869 |
| H | 1.20221477  | 1.27011403  | 4.64939766  |
| H | -4.58312833 | 2.14069218  | -0.96036906 |
| N | 0.35206290  | 1.70780856  | 1.51164386  |
| N | 0.39513246  | 0.34223099  | 1.58210763  |
| C | 0.66789308  | 2.23679140  | 2.71603701  |
| C | 0.92383347  | 1.19464637  | 3.60429816  |
| C | 0.74117273  | 0.02982633  | 2.84839958  |
| H | 2.06810518  | 3.75741940  | -1.34486713 |
| C | 2.05148175  | 2.67798912  | -1.44474461 |
| H | 2.76791760  | -0.43486360 | -2.15309453 |
| H | 0.69068151  | 3.31216356  | 2.85401980  |
| N | 1.26492873  | 0.61845154  | -1.10816552 |
| W | -0.04770509 | -0.97693877 | -0.13990330 |
| H | -2.69426083 | -2.12222246 | -0.96742702 |
| O | 2.42751901  | -2.79251143 | 0.50458553  |
| O | -1.28593765 | -2.91614117 | 2.00019927  |
| C | -0.87378106 | -2.17320748 | 1.18469062  |
| C | 1.49927241  | -2.11247420 | 0.25383644  |
| C | -0.85196051 | -1.75245132 | -2.08053736 |
| H | -1.22995684 | -0.93558350 | -2.69507537 |
| C | 0.50722830  | -2.15802470 | -2.10854933 |
| H | 1.18702144  | -1.64436534 | -2.78620118 |
| H | 0.75410932  | -3.20191601 | -1.90970151 |
| H | -1.45042614 | -3.45448368 | -0.88005430 |
| C | -1.64966842 | -2.40226461 | -1.09024746 |

$\Delta H = 0.0 \text{ kcal mol}^{-1}$   
 $\Delta G = 0.0 \text{ kcal mol}^{-1}$

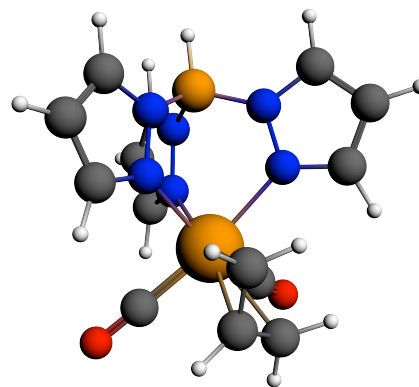

**3b: *gauche*-TpW(CO)<sub>2</sub>( $\eta^3$ -C<sub>3</sub>H<sub>5</sub>)**

**TZP/BP**

**Coordinates (XYZ):**

|   |             |             |             |
|---|-------------|-------------|-------------|
| B | -0.12243242 | -2.37028356 | -0.12622430 |
| H | -0.17876703 | -3.56668523 | -0.22342124 |
| H | 3.79974801  | -2.17563443 | 2.56524530  |
| H | 0.86246991  | 0.87702325  | -3.22785288 |
| H | -3.25972089 | 0.68679923  | 1.24360003  |
| N | -1.44893452 | -1.82113681 | 0.42932922  |
| N | -1.61963415 | -0.47750050 | 0.60450073  |
| C | -2.58944908 | -2.48124988 | 0.75266491  |
| C | -3.53591126 | -1.54571636 | 1.15447374  |
| C | -2.88137763 | -0.30838489 | 1.03988056  |
| C | 2.48361068  | -0.59276978 | 1.68797844  |
| C | 2.91876499  | -1.88913354 | 2.00186258  |
| N | 1.04021543  | -1.96190119 | 0.80585549  |
| H | -2.64173741 | -3.56103649 | 0.67280549  |
| H | 0.90118270  | -1.46198067 | -4.68844082 |
| H | -4.55425529 | -1.73156228 | 1.47716003  |
| N | 0.15447530  | -1.73088992 | -1.50494386 |
| N | 0.34747061  | -0.38239739 | -1.61635913 |
| C | 0.35856513  | -2.32112229 | -2.70877930 |
| C | 0.68162270  | -1.33443066 | -3.63433463 |
| C | 0.66433605  | -0.13765934 | -2.90235575 |
| H | 1.91262749  | -3.80992197 | 1.37258737  |
| C | 1.97814942  | -2.72857895 | 1.41283453  |
| H | 2.93137208  | 0.36352578  | 1.93256714  |
| H | 0.26739111  | -3.39624603 | -2.81364937 |
| N | 1.34586551  | -0.64105478 | 0.96970540  |
| W | 0.05169589  | 0.98493653  | 0.11532029  |
| H | 0.65518887  | 1.05447358  | 3.01603274  |
| O | 2.59988552  | 2.62025543  | -0.68514239 |
| O | -1.93616202 | 2.26069447  | -1.97976039 |
| C | -1.17899493 | 1.85079474  | -1.18216450 |
| C | 1.62391777  | 2.01433060  | -0.40850217 |
| C | 0.06928345  | 2.66059240  | 1.67666151  |
| H | 0.96367139  | 3.27475118  | 1.77097732  |
| C | -1.00860188 | 3.00276493  | 0.78988476  |
| H | -0.90536625 | 3.90105151  | 0.18111740  |
| H | -2.02873415 | 2.80896552  | 1.13482812  |
| H | -1.14880507 | 1.16584153  | 2.66299911  |
| C | -0.13383406 | 1.45241532  | 2.37799129  |

$\Delta H = 7.0 \text{ kcal mol}^{-1}$   
 $\Delta G = 7.0 \text{ kcal mol}^{-1}$

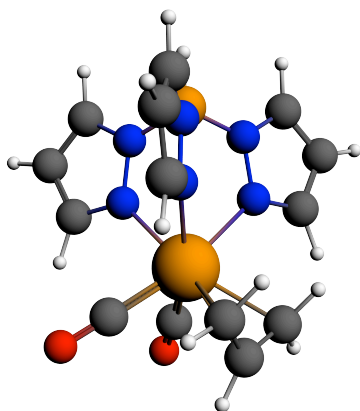

**3c: *endo*-TpW(CO)<sub>2</sub>(η<sup>3</sup>-C<sub>3</sub>H<sub>5</sub>)**

**TZP/BP**

Coordinates (XYZ):

|   |             |             |             |
|---|-------------|-------------|-------------|
| B | -0.15080164 | 2.42924878  | 0.00000000  |
| H | -0.28668612 | 3.62338111  | 0.00000000  |
| H | 1.81106235  | 2.10683169  | 4.30431331  |
| H | -3.19596709 | -1.00645483 | 0.00000000  |
| H | 1.60175983  | -0.38309322 | -3.17208821 |
| N | 0.60167387  | 1.97708309  | -1.26036456 |
| N | 0.83340808  | 0.64801101  | -1.49489571 |
| C | 0.95539583  | 2.71298805  | -2.34198434 |
| C | 1.43928332  | 1.85022758  | -3.31851005 |
| C | 1.33898961  | 0.57545777  | -2.74436639 |
| C | 1.33898961  | 0.57545777  | 2.74436639  |
| C | 1.43928332  | 1.85022758  | 3.31851005  |
| N | 0.60167387  | 1.97708309  | 1.26036456  |
| H | 0.83546371  | 3.79047905  | -2.33536147 |
| H | -4.77226940 | 1.25050099  | 0.00000000  |
| H | 1.81106235  | 2.10683169  | -4.30431331 |
| N | -1.52777437 | 1.73115390  | 0.00000000  |
| N | -1.58753915 | 0.36349590  | 0.00000000  |
| C | -2.77750763 | 2.24311989  | 0.00000000  |
| C | -3.68984054 | 1.18925104  | 0.00000000  |
| C | -2.89836939 | 0.03551440  | 0.00000000  |
| H | 0.83546371  | 3.79047905  | 2.33536147  |
| C | 0.95539583  | 2.71298805  | 2.34198434  |
| H | 1.60175983  | -0.38309322 | 3.17208821  |
| H | -2.93099804 | 3.31684650  | 0.00000000  |
| N | 0.83340808  | 0.64801101  | 1.49489571  |
| W | 0.16525494  | -0.98102729 | 0.00000000  |
| H | 1.70370993  | -2.49704662 | -2.14909508 |
| O | -1.49713823 | -2.80910191 | 1.94128881  |
| O | -1.49713823 | -2.80910191 | -1.94128881 |
| C | -0.83381155 | -2.12918148 | -1.24746382 |
| C | -0.83381155 | -2.12918148 | 1.24746382  |
| C | 1.72149938  | -2.74614182 | 0.00000000  |
| H | 1.28077462  | -3.74283170 | 0.00000000  |
| C | 1.91129982  | -2.01797564 | 1.19271413  |
| H | 1.70370993  | -2.49704662 | 2.14909508  |
| H | 2.68526730  | -1.24728988 | 1.20139432  |
| H | 2.68526730  | -1.24728988 | -1.20139432 |
| C | 1.91129982  | -2.01797564 | -1.19271413 |

ΔH = 8.6 kcal mol<sup>-1</sup>  
ΔG = 8.7 kcal mol<sup>-1</sup>

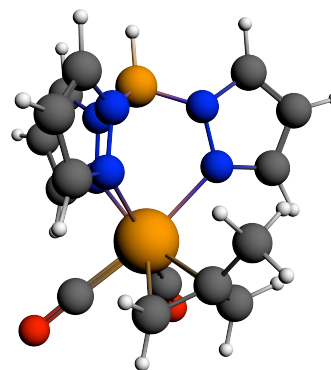

**4a: *exo*-TpW(CO)<sub>2</sub>(η<sup>3</sup>-C<sub>3</sub>H<sub>4</sub>Me)**

**TZP/BP**

Coordinates (XYZ):

|   |             |             |             |
|---|-------------|-------------|-------------|
| B | 0.01818582  | 2.40081082  | 0.16414958  |
| H | 0.04696527  | 3.59640539  | 0.28576784  |
| H | 3.63534895  | 2.13561239  | -2.89019630 |
| H | 0.90526723  | -1.00239567 | 3.12158565  |
| H | -3.54205651 | -0.42086913 | -0.44979366 |
| N | -1.40374503 | 1.94462589  | -0.20845343 |
| N | -1.70511478 | 0.61267886  | -0.29408900 |
| C | -2.53815310 | 2.68453028  | -0.26144597 |
| C | -3.61881515 | 1.82031749  | -0.38912263 |
| C | -3.04734115 | 0.53967613  | -0.39374887 |
| C | 2.33372888  | 0.57419053  | -1.95645703 |
| C | 2.79416284  | 1.86287020  | -2.26262686 |
| N | 1.03131362  | 1.95658908  | -0.90641577 |
| H | -2.49260127 | 3.76554464  | -0.19304547 |
| H | 1.31295020  | 1.27793720  | 4.61543620  |
| H | -4.66978834 | 2.07826785  | -0.45768889 |
| N | 0.40271638  | 1.71328523  | 1.49402923  |
| N | 0.43922308  | 0.34748852  | 1.56786504  |
| C | 0.74380527  | 2.24302829  | 2.69100128  |
| C | 1.01284374  | 1.20168638  | 3.57638822  |
| C | 0.80843152  | 0.03628847  | 2.82732788  |
| H | 1.92304257  | 3.79269314  | -1.48228173 |
| C | 1.94304681  | 2.71203365  | -1.56542889 |
| H | 2.73368326  | -0.37992219 | -2.27284622 |
| H | 0.77155284  | 3.31847829  | 2.82739646  |
| N | 1.25946395  | 0.62830049  | -1.14402628 |
| W | -0.04455396 | -0.97160532 | -0.14027996 |
| H | -2.63833093 | -1.92908532 | -1.33440565 |
| O | 2.26835979  | -2.89209990 | 0.76410140  |
| O | -1.57365270 | -2.82850259 | 1.87956730  |
| C | -1.02672514 | -2.12615363 | 1.10912601  |
| C | 1.42929239  | -2.15123370 | 0.39789796  |
| C | -0.64963821 | -1.73592783 | -2.18296885 |
| H | -0.15043248 | -0.11238261 | -3.53882149 |
| C | 0.65859555  | -2.26802714 | -1.97118165 |
| H | 1.48012508  | -1.87648207 | -2.57084453 |
| H | 0.76369666  | -3.32128460 | -1.70496302 |
| H | -1.52830859 | -3.34760709 | -1.01368717 |
| C | -1.61258644 | -2.29423156 | -1.28718938 |
| C | -0.99648764 | -0.76689309 | -3.28960181 |
| H | -1.26077956 | -1.33325989 | -4.19839084 |
| H | -1.85685879 | -0.13733860 | -3.02655898 |

ΔH = 0.0 kcal mol<sup>-1</sup>  
ΔG = 0.0 kcal mol<sup>-1</sup>

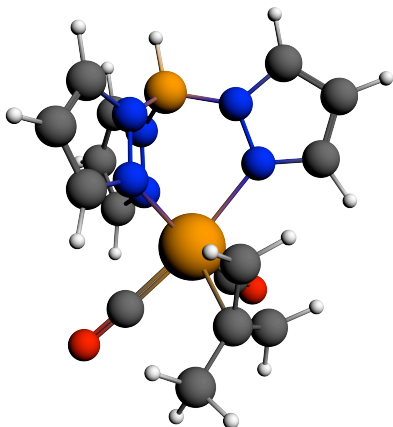

**4b: *gauche*-TpW(CO)<sub>2</sub>( $\eta^3$ -C<sub>3</sub>H<sub>4</sub>Me)**

**TZP/BP**

**Coodinates (XYZ):**

|   |             |             |             |
|---|-------------|-------------|-------------|
| B | -0.12652576 | -2.37720267 | -0.12392271 |
| H | -0.18892006 | -3.57382489 | -0.21573388 |
| H | 3.79359196  | -2.19991232 | 2.57158149  |
| H | 0.86685440  | 0.85989663  | -3.23049904 |
| H | -3.25462534 | 0.70148855  | 1.22090440  |
| N | -1.45058791 | -1.81897733 | 0.42911923  |
| N | -1.61493375 | -0.47374851 | 0.59954513  |
| C | -2.59858022 | -2.47123114 | 0.74221823  |
| C | -3.54349161 | -1.52922523 | 1.13170223  |
| C | -2.87975069 | -0.29620648 | 1.02333255  |
| C | 2.48821761  | -0.61055340 | 1.69089824  |
| C | 2.91606234  | -1.90876057 | 2.00515898  |
| N | 1.04001232  | -1.97117695 | 0.80452315  |
| H | -2.65741490 | -3.55069013 | 0.66226394  |
| H | 0.89312275  | -1.48004049 | -4.68914058 |
| H | -4.56635804 | -1.70868391 | 1.44364191  |
| N | 0.14993270  | -1.74370969 | -1.50456723 |
| N | 0.34803498  | -0.39565599 | -1.61651345 |
| C | 0.35125189  | -2.33541935 | -2.70813595 |
| C | 0.67430177  | -1.35026470 | -3.63511891 |
| C | 0.66397967  | -0.15333296 | -2.90345054 |
| H | 1.89884339  | -3.82401061 | 1.37729343  |
| C | 1.97146369  | -2.74304996 | 1.41520325  |
| H | 2.94026197  | 0.34321693  | 1.93621626  |
| H | 0.25755013  | -3.41049786 | -2.81172573 |
| N | 1.35307772  | -0.65190955 | 0.96825938  |
| W | 0.06660555  | 0.98218217  | 0.11593376  |
| H | 0.68432551  | 1.06472931  | 3.01891912  |
| O | 2.58828554  | 2.57547151  | -0.83141199 |
| O | -1.86557782 | 2.31912564  | -1.99674069 |
| C | -1.13798114 | 1.87296501  | -1.19101890 |
| C | 1.62836390  | 1.99182595  | -0.46306637 |
| C | 0.07902487  | 2.67738429  | 1.69851620  |
| H | 1.45480837  | 4.24943089  | 1.10149634  |
| C | -1.01849158 | 2.96886010  | 0.80694594  |
| H | -0.95166078 | 3.87955294  | 0.20860967  |
| H | -2.03166454 | 2.74213678  | 1.15416004  |
| H | -1.11720748 | 1.12749147  | 2.64601160  |
| C | -0.10819882 | 1.44493219  | 2.37164184  |
| C | 1.19630548  | 3.64601243  | 1.98088905  |
| H | 0.88040954  | 4.33324101  | 2.78399790  |
| H | 2.10272245  | 3.12945610  | 2.32536405  |

$\Delta H = 5.2 \text{ kcal mol}^{-1}$   
 $\Delta G = 6.6 \text{ kcal mol}^{-1}$

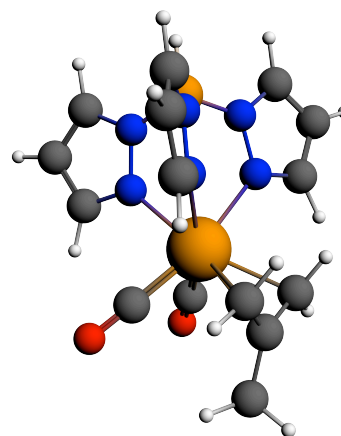

**4c: *endo*-TpW(CO)<sub>2</sub>( $\eta^3$ -C<sub>3</sub>H<sub>4</sub>Me)**

**TZP/BP**

**Coodinates (XYZ):**

|   |             |             |             |
|---|-------------|-------------|-------------|
| B | -0.14198692 | 2.43260975  | -0.00009788 |
| H | -0.26938685 | 3.62761453  | -0.00029554 |
| H | 1.81795509  | 2.09888957  | 4.30415734  |
| H | -3.21252925 | -0.97960281 | -0.00070389 |
| H | 1.58656471  | -0.39186864 | -3.17331642 |
| N | 0.60677174  | 1.97496756  | -1.26101012 |
| N | 0.82742455  | 0.64460486  | -1.49646658 |
| C | 0.96766375  | 2.70934274  | -2.34162271 |
| C | 1.44374250  | 1.84340301  | -3.31888622 |
| C | 1.33232962  | 0.56897419  | -2.74558046 |
| C | 1.33269608  | 0.56967136  | 2.74551417  |
| C | 1.44416829  | 1.84421164  | 3.31858059  |
| N | 0.60715274  | 1.97535779  | 1.26070556  |
| H | 0.85724900  | 3.78789637  | -2.33386653 |
| H | -4.77159631 | 1.28984592  | 0.00237209  |
| H | 1.81736377  | 2.09790742  | -4.30456563 |
| N | -1.52339768 | 1.74412882  | 0.00011233  |
| N | -1.59354345 | 0.37704555  | 0.00025378  |
| C | -2.76914329 | 2.26625197  | -0.00101660 |
| C | -3.68964794 | 1.21990825  | 0.00124465  |
| C | -2.90701905 | 0.06007286  | -0.00052056 |
| H | 0.85553086  | 3.78830033  | 2.33405668  |
| C | 0.96678355  | 2.70984005  | 2.34170218  |
| H | 1.58727096  | -0.39101532 | 3.17341123  |
| H | -2.91387282 | 3.34116456  | -0.00174637 |
| N | 0.82854194  | 0.64508250  | 1.49607666  |
| W | 0.14672246  | -0.98326205 | 0.00011660  |
| H | 1.70427439  | -2.49867439 | -2.14421011 |
| O | -1.52666632 | -2.80197073 | 1.93723584  |
| O | -1.52371271 | -2.80265902 | -1.93866395 |
| C | -0.85731209 | -2.12322201 | -1.24493909 |
| C | -0.85935408 | -2.12271321 | 1.24428905  |
| C | 1.71535969  | -2.78567715 | 0.00102373  |
| H | 2.20311586  | -4.86004241 | 0.00024547  |
| C | 1.88869869  | -2.02762984 | 1.18368837  |
| H | 1.69705370  | -2.50294869 | 2.14693733  |
| H | 2.65011159  | -1.24466188 | 1.18452527  |
| H | 2.65397742  | -1.24201568 | -1.17632617 |
| C | 1.89286297  | -2.02529335 | -1.17943205 |
| C | 1.29619924  | -4.23212989 | -0.00119324 |
| H | 0.70961227  | -4.49093111 | 0.88989431  |
| H | 0.71353322  | -4.48931062 | -0.89530920 |

$\Delta H = 6.1 \text{ kcal mol}^{-1}$   
 $\Delta G = 7.6 \text{ kcal mol}^{-1}$

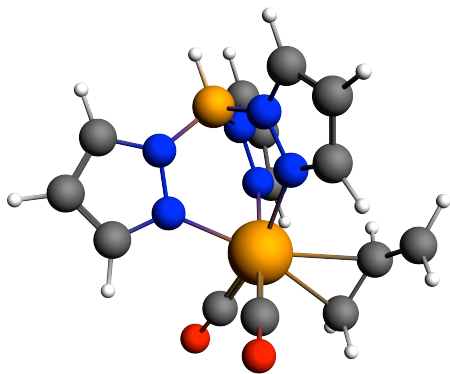

***exo*-TpMo(CO)<sub>2</sub>(η<sup>3</sup>-C<sub>3</sub>H<sub>5</sub>) 1A**

**ATZP/BP**

**Coodinates (XYZ):**

|    |             |             |             |
|----|-------------|-------------|-------------|
| B  | 0.06895593  | 2.36068685  | 0.18702505  |
| H  | 0.08161868  | 3.56166280  | 0.27818037  |
| H  | 3.65036044  | 1.92656492  | -2.89592243 |
| H  | 0.84164709  | -0.90386478 | 3.33888947  |
| H  | -3.47932000 | -0.47568730 | -0.63374097 |
| N  | -1.35350494 | 1.88759714  | -0.22082263 |
| N  | -1.67335866 | 0.55980473  | -0.28993488 |
| C  | -2.46138997 | 2.62796734  | -0.43781391 |
| C  | -3.53172419 | 1.77328479  | -0.67353363 |
| C  | -2.99190477 | 0.48956374  | -0.55153945 |
| C  | 2.29862496  | 0.43396717  | -1.92374419 |
| C  | 2.81659093  | 1.69715241  | -2.24420954 |
| N  | 1.09251187  | 1.88488782  | -0.85558222 |
| H  | -2.40986536 | 3.70991621  | -0.40276902 |
| H  | 1.29136972  | 1.44975358  | 4.69513537  |
| H  | -4.55764264 | 2.04249990  | -0.88993716 |
| N  | 0.43448373  | 1.71910618  | 1.54552679  |
| N  | 0.44768895  | 0.36214263  | 1.70008572  |
| C  | 0.73563679  | 2.31046344  | 2.72366434  |
| C  | 1.00678725  | 1.31913359  | 3.65882180  |
| C  | 0.78203464  | 0.11720084  | 2.98057059  |
| H  | 2.05529499  | 3.67221893  | -1.46949949 |
| C  | 2.02486659  | 2.59098265  | -1.53809706 |
| H  | 2.61833938  | -0.54473819 | -2.26012793 |
| H  | 0.73055951  | 3.39069657  | 2.81056755  |
| N  | 1.25491203  | 0.55003807  | -1.08508371 |
| Mo | -0.08297891 | -0.97376540 | 0.02056510  |
| H  | -1.79981852 | -3.07715047 | -1.05595478 |
| O  | 2.38478991  | -2.91349100 | 0.50053961  |
| O  | -1.83168255 | -2.54640568 | 2.05527523  |
| C  | -1.17603880 | -1.98483252 | 1.26817792  |
| C  | 1.47689962  | -2.22190180 | 0.32059636  |
| C  | -0.65950991 | -1.78584436 | -2.38355891 |
| H  | -1.51051844 | -1.11516864 | -2.54269984 |
| C  | 0.36144823  | -1.68490758 | -3.31515639 |
| H  | 0.35280866  | -0.90550577 | -4.07198700 |
| H  | 1.18091099  | -2.40260206 | -3.33960448 |
| H  | -0.06945434 | -3.56936835 | -1.34328084 |
| C  | -0.79994074 | -2.75870641 | -1.34570452 |

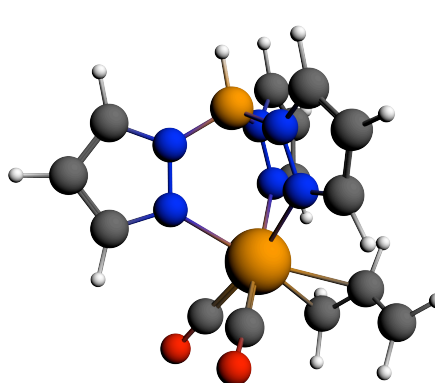

***exo*-TpMo(CO)<sub>2</sub>(η<sup>3</sup>-C<sub>3</sub>H<sub>5</sub>) 2A**

**ATZP/BP**

**Coodinates (XYZ):**

|    |             |             |             |
|----|-------------|-------------|-------------|
| B  | 0.03316191  | 2.36711105  | 0.24988130  |
| H  | 0.07673931  | 3.56400167  | 0.35085475  |
| H  | 3.58635240  | 1.99186365  | -2.89635183 |
| H  | 0.97392588  | -0.95221183 | 3.27650266  |
| H  | -3.47107243 | -0.35316653 | -1.01062487 |
| N  | -1.38136825 | 1.93660940  | -0.19956944 |
| N  | -1.69445139 | 0.61632236  | -0.38807074 |
| C  | -2.45159148 | 2.71325759  | -0.49173520 |
| C  | -3.50428638 | 1.88785842  | -0.87581829 |
| C  | -2.98095293 | 0.58976941  | -0.80068050 |
| C  | 2.21910999  | 0.47336089  | -1.98365517 |
| C  | 2.76018686  | 1.74251475  | -2.23956317 |
| N  | 1.07022020  | 1.89038905  | -0.79157433 |
| H  | -2.38537418 | 3.79231215  | -0.40969903 |
| H  | 1.28546926  | 1.37136535  | 4.72902550  |
| H  | -4.50582632 | 2.18573151  | -1.16587217 |
| N  | 0.35401593  | 1.70745065  | 1.60155057  |
| N  | 0.44666639  | 0.34540161  | 1.69650072  |
| C  | 0.68271446  | 2.27771500  | 2.78966986  |
| C  | 0.98614950  | 1.26438299  | 3.69229355  |
| C  | 0.82682840  | 0.07486963  | 2.96298866  |
| H  | 2.04864821  | 3.68917814  | -1.34631936 |
| C  | 1.99978375  | 2.61257289  | -1.46470717 |
| H  | 2.50327719  | -0.49648259 | -2.37562064 |
| H  | 0.68669667  | 3.35638607  | 2.89928359  |
| N  | 1.19557053  | 0.56446601  | -1.11114973 |
| Mo | -0.09527351 | -0.94647065 | -0.02087191 |
| H  | -2.44722644 | -2.07011842 | -1.23385294 |
| O  | 2.46428918  | -2.74253861 | 0.44044473  |
| O  | -1.39620416 | -2.92117171 | 2.11445416  |
| C  | -0.98453418 | -2.17130591 | 1.32165402  |
| C  | 1.50274406  | -2.09711051 | 0.24298158  |
| C  | -0.56370343 | -1.76447098 | -2.27255275 |
| H  | -0.92983815 | -0.84257782 | -2.73287737 |
| C  | 0.54904615  | -2.37167334 | -2.86285989 |
| H  | 1.07228100  | -1.89826372 | -3.69117957 |
| H  | 0.91765079  | -3.33569827 | -2.51224866 |
| H  | -1.24997484 | -3.42627185 | -1.05810213 |
| C  | -1.39649042 | -2.36301991 | -1.26451439 |



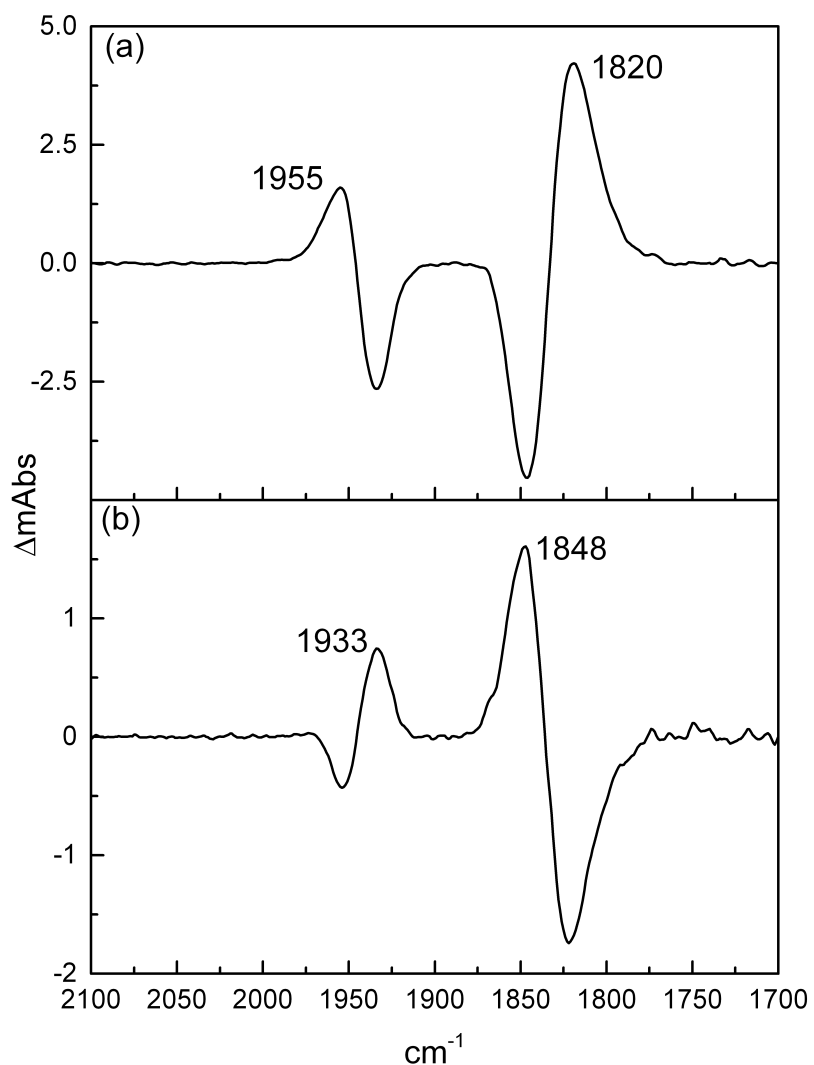

Figure S1: Photolysis of  $\text{TpMo}(\text{CO})_2(\eta^3\text{-C}_3\text{H}_4\text{Me})$  in PVC at 85 K. (a) Difference spectrum obtained following  $\lambda_{\text{irr}} = 450 \pm 50$  nm photolysis of unphotolyzed sample. (b) Difference following  $\lambda_{\text{irr}} = 550 \pm 50$  nm back photolysis of  $\lambda_{\text{irr}} > 450$  nm irradiated sample.

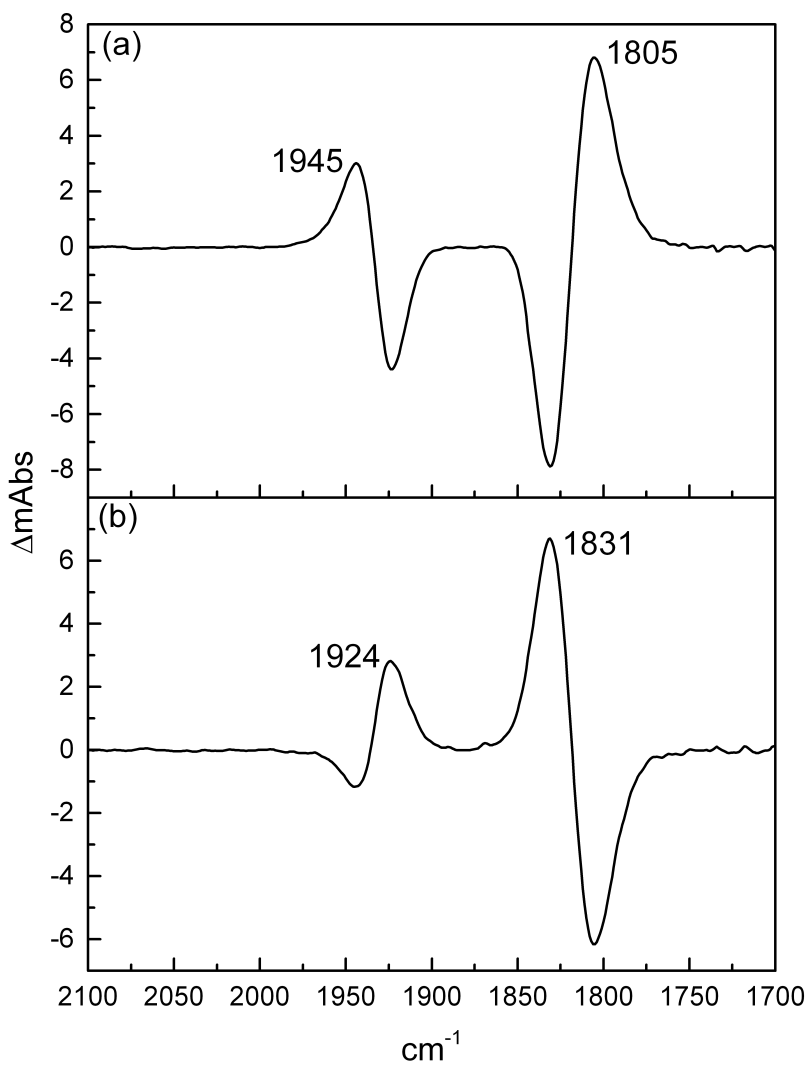

Figure S2: Photolysis of  $TpW(CO)_2(\eta^3-C_3H_5)$  in PVC at 85 K. (a) Difference spectrum obtained following  $\lambda_{irr} = 400 \pm 50$  nm photolysis of unphotolyzed sample. (b) Difference following  $\lambda_{irr} = 550 \pm 50$  nm back photolysis of  $\lambda_{irr} > 400$  nm irradiated sample.

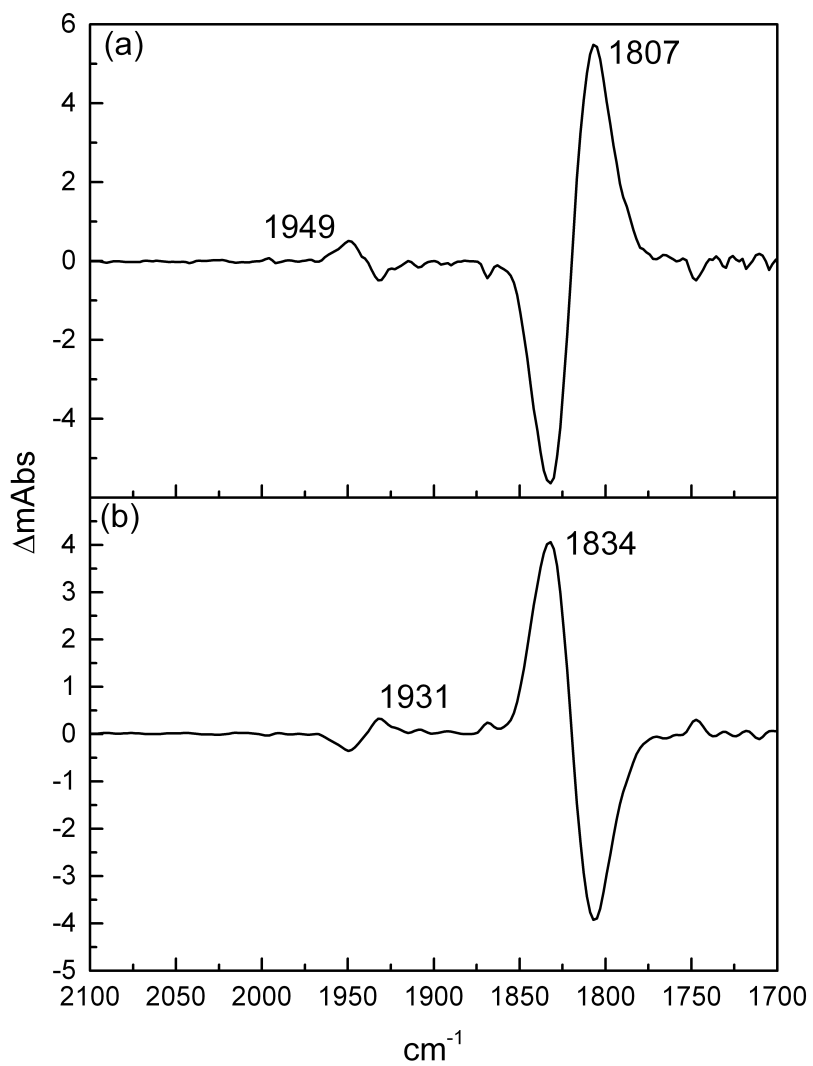

Figure S3: Photolysis of  $TpW(CO)_2(\eta^3-C_3H_4Me)$  in PVC at 85 K. (a) Difference spectrum obtained following  $\lambda_{irr} = 400 \pm 50$  nm photolysis of unphotolyzed sample. (b) Difference following  $\lambda_{irr} = 550 \pm 50$  nm back photolysis of  $\lambda_{irr} > 400$  nm irradiated sample.

**exo-TpMo(CO)<sub>2</sub>(η<sup>3</sup>-C<sub>3</sub>H<sub>5</sub>) SAOP  
Excitation Energies**

| no. | E/a.u.  | E/eV    | f          | Symmetry |
|-----|---------|---------|------------|----------|
| 1:  | 0.11980 | 3.25986 | 0.1170E-01 | A        |
| 2:  | 0.12330 | 3.35504 | 0.3527E-01 | A        |
| 3:  | 0.13624 | 3.70728 | 0.9321E-03 | A        |
| 4:  | 0.14488 | 3.94232 | 0.1003     | A        |
| 5:  | 0.15078 | 4.10306 | 0.8684E-02 | A        |
| 6:  | 0.15249 | 4.14942 | 0.2723E-01 | A        |
| 7:  | 0.15715 | 4.27614 | 0.2617E-02 | A        |
| 8:  | 0.15939 | 4.33727 | 0.2420     | A        |
| 9:  | 0.16272 | 4.42789 | 0.9107E-02 | A        |
| 10: | 0.16821 | 4.57735 | 0.1351E-01 | A        |
| 11: | 0.16858 | 4.58732 | 0.1117E-01 | A        |
| 12: | 0.16994 | 4.62429 | 0.6341E-01 | A        |
| 13: | 0.17133 | 4.66202 | 0.3427E-02 | A        |
| 14: | 0.17171 | 4.67240 | 0.2255E-01 | A        |
| 15: | 0.17192 | 4.67820 | 0.3666E-01 | A        |
| 16: | 0.17374 | 4.72770 | 0.1693E-01 | A        |
| 17: | 0.17754 | 4.83104 | 0.4153E-01 | A        |
| 18: | 0.17850 | 4.85730 | 0.1864E-01 | A        |
| 19: | 0.18013 | 4.90148 | 0.5203E-02 | A        |
| 20: | 0.18043 | 4.90980 | 0.3094E-02 | A        |
| 21: | 0.18137 | 4.93526 | 0.2679E-01 | A        |
| 22: | 0.18284 | 4.97540 | 0.5630E-02 | A        |
| 23: | 0.18532 | 5.04283 | 0.1635E-01 | A        |
| 24: | 0.18776 | 5.10922 | 0.1745E-01 | A        |
| 25: | 0.18910 | 5.14562 | 0.2486E-01 | A        |
| 26: | 0.19124 | 5.20378 | 0.3300E-01 | A        |
| 27: | 0.19289 | 5.24890 | 0.4284E-01 | A        |
| 28: | 0.19346 | 5.26438 | 0.4683E-01 | A        |
| 29: | 0.19472 | 5.29862 | 0.8900E-01 | A        |
| 30: | 0.19609 | 5.33576 | 0.4876E-01 | A        |
| 31: | 0.19737 | 5.37062 | 0.2752E-01 | A        |
| 32: | 0.19788 | 5.38459 | 0.1106E-01 | A        |
| 33: | 0.19898 | 5.41465 | 0.2646E-01 | A        |
| 34: | 0.19952 | 5.42919 | 0.3808E-01 | A        |
| 35: | 0.20056 | 5.45758 | 0.6709E-01 | A        |
| 36: | 0.20109 | 5.47196 | 0.3696E-02 | A        |
| 37: | 0.20155 | 5.48436 | 0.4010E-01 | A        |
| 38: | 0.20246 | 5.50929 | 0.9644E-03 | A        |
| 39: | 0.20412 | 5.55435 | 0.1570E-02 | A        |
| 40: | 0.20468 | 5.56955 | 0.1936E-01 | A        |
| 41: | 0.20491 | 5.57591 | 0.1112E-01 | A        |
| 42: | 0.20583 | 5.60090 | 0.5611E-02 | A        |
| 43: | 0.20675 | 5.62586 | 0.5939E-01 | A        |
| 44: | 0.20721 | 5.63849 | 0.5609E-02 | A        |
| 45: | 0.20774 | 5.65299 | 0.7729E-02 | A        |
| 46: | 0.20942 | 5.69856 | 0.5342E-01 | A        |
| 47: | 0.20998 | 5.71380 | 0.2229E-01 | A        |
| 48: | 0.21050 | 5.72794 | 0.6564E-03 | A        |
| 49: | 0.21063 | 5.73156 | 0.1755E-01 | A        |
| 50: | 0.21112 | 5.74495 | 0.1499E-01 | A        |

**gauche-TpMo(CO)<sub>2</sub>(η<sup>3</sup>-C<sub>3</sub>H<sub>5</sub>) SAOP  
Excitation Energies**

| no. | E/a.u.  | E/eV    | f          | Symmetry |
|-----|---------|---------|------------|----------|
| 1:  | 0.11073 | 3.01299 | 0.1749E-01 | A        |
| 2:  | 0.11870 | 3.22999 | 0.3096E-01 | A        |
| 3:  | 0.12052 | 3.27952 | 0.7239E-01 | A        |
| 4:  | 0.12925 | 3.51707 | 0.4605E-02 | A        |
| 5:  | 0.12993 | 3.53568 | 0.2293E-01 | A        |
| 6:  | 0.13551 | 3.68750 | 0.2362E-01 | A        |
| 7:  | 0.14560 | 3.96192 | 0.1136     | A        |
| 8:  | 0.15148 | 4.12186 | 0.3782E-01 | A        |
| 9:  | 0.15632 | 4.25381 | 0.2643E-01 | A        |
| 10: | 0.15757 | 4.28757 | 0.9321E-04 | A        |
| 11: | 0.16137 | 4.39120 | 0.2525E-01 | A        |
| 12: | 0.16249 | 4.42160 | 0.5533E-01 | A        |
| 13: | 0.16607 | 4.51890 | 0.1258     | A        |
| 14: | 0.16909 | 4.60110 | 0.3746E-02 | A        |
| 15: | 0.16914 | 4.60265 | 0.7897E-02 | A        |
| 16: | 0.17159 | 4.66930 | 0.1194     | A        |
| 17: | 0.17274 | 4.70054 | 0.3448E-02 | A        |
| 18: | 0.17335 | 4.71722 | 0.2979E-01 | A        |
| 19: | 0.17372 | 4.72724 | 0.1474E-01 | A        |
| 20: | 0.17583 | 4.78452 | 0.3999E-01 | A        |
| 21: | 0.17731 | 4.82494 | 0.1736E-02 | A        |
| 22: | 0.17811 | 4.84656 | 0.9082E-02 | A        |
| 23: | 0.17986 | 4.89434 | 0.3627E-02 | A        |
| 24: | 0.18012 | 4.90129 | 0.2633E-01 | A        |
| 25: | 0.18140 | 4.93613 | 0.1051E-01 | A        |
| 26: | 0.18432 | 5.01548 | 0.5759E-01 | A        |
| 27: | 0.18526 | 5.04111 | 0.9064E-01 | A        |
| 28: | 0.18612 | 5.06455 | 0.2015E-01 | A        |
| 29: | 0.18710 | 5.09128 | 0.6145E-02 | A        |
| 30: | 0.18751 | 5.10244 | 0.5622E-01 | A        |
| 31: | 0.18819 | 5.12103 | 0.1454E-01 | A        |
| 32: | 0.18932 | 5.15172 | 0.1199E-01 | A        |
| 33: | 0.19106 | 5.19898 | 0.8078E-02 | A        |
| 34: | 0.19131 | 5.20590 | 0.1726E-01 | A        |
| 35: | 0.19322 | 5.25769 | 0.1920E-01 | A        |
| 36: | 0.19420 | 5.28449 | 0.2909E-01 | A        |
| 37: | 0.19448 | 5.29219 | 0.4674E-02 | A        |
| 38: | 0.19495 | 5.30482 | 0.2681E-01 | A        |
| 39: | 0.19590 | 5.33083 | 0.5776E-01 | A        |
| 40: | 0.19613 | 5.33706 | 0.1721E-02 | A        |
| 41: | 0.19758 | 5.37630 | 0.6259E-01 | A        |
| 42: | 0.19898 | 5.41450 | 0.8544E-02 | A        |
| 43: | 0.19958 | 5.43097 | 0.3442E-01 | A        |
| 44: | 0.19978 | 5.43619 | 0.4289E-01 | A        |
| 45: | 0.20122 | 5.47548 | 0.3601E-01 | A        |
| 46: | 0.20191 | 5.49425 | 0.2865E-01 | A        |
| 47: | 0.20247 | 5.50944 | 0.3341E-01 | A        |
| 48: | 0.20387 | 5.54764 | 0.5123E-01 | A        |
| 49: | 0.20401 | 5.55140 | 0.1896E-01 | A        |
| 50: | 0.20534 | 5.58766 | 0.8431E-02 | A        |
